# Supplementary material for: Wave activity in front of high-β Earth bow shocks
Source: Copernicus journal article supplement (doi:10.5194/angeo-2018-110), 2018-09-28
Supplement: Supplementary file [file angeo-2018-110-RC2-supplement.pdf]

### **Review on the paper angeo-2018-110**

The paper is devoted to analysis of high- $\beta$  shocks. The subject is timely, there are no many studies of such shocks. The problem of the paper that analysis has not been done. The manuscript leaves the impression that the study has only begun. There paper does not arrive to any conclusions. There is attempt to convert temporal measurements to spatial one and, therefore, relate the nice figures to shock physics (eg ion motion). It is not clear what is called "waves". The choice of a model normal against other methods is not justified. It is now even said what is "full resolution" of the magnetic field measurements. Are readers supposed to know that ? Except statistics of high- $\beta$  occurrence and nice magnetic profiles (the third one seems to be a typical quasi-parallel shock), there is no new physics in the paper. It should be returned to the authors for completion of the study before submitting again.
